# Supplementary material
Source: HighWire-hosted journal article supplement (https://neurologyopen.bmj.com/content/5/1/e000343)
Supplement: inline-supplementary-material-1 [file inline-supplementary-material-1.pdf]

| ID            | LOC | AOC | PTA | NSI Days From Blast | NSI-22 Score | Validity-10 Score | MACE-2 VOMS |   |   | NSI Vision ^ (6) | NSI Light Sensitive (7) |   |   | NSI Headache (4) | NSI Noise Sensitive ^ (9) |   |    | NSI Nausea ^ (5) | MACE-2 Cognitive |   |   |   | NSI Anxiety (19) | NSI Depressed (20) | NSI Irritability (21) | NSI Frustration (22) | NSI Fatigue (17) | NSI Sleep (18) | NSI Hearing ^ (8) | NSI Numb/Tingle (10) | NSI Taste/Smell ^ (11) | NSI Appetite (12) |   |   |   |   |   |   |   |
|---------------|-----|-----|-----|---------------------|--------------|-------------------|-------------|---|---|------------------|-------------------------|---|---|------------------|---------------------------|---|----|------------------|------------------|---|---|---|------------------|--------------------|-----------------------|----------------------|------------------|----------------|-------------------|----------------------|------------------------|-------------------|---|---|---|---|---|---|---|
|               |     |     |     |                     |              |                   | 1           | 2 | 3 |                  | 1                       | 2 | 3 |                  | 1                         | 2 | 3  |                  | 1                | 2 | 3 | 1 |                  |                    |                       |                      |                  |                |                   |                      |                        |                   | 2 | 3 | 1 | 2 | 3 | 4 |   |
| Validity-10^  | 1   | X   |     |                     | 5            | 70                | 29          | A | 3 | 0                | 1                       | 2 | 4 | 4                | 4                         | 3 | 22 | 4                | 4                | 4 | 4 | 4 | 4                | 4                  | 4                     | 4                    | 4                | 4              | 4                 | 4                    | 4                      | 4                 | 4 |   |   |   |   |   |   |
|               | 2   | X   |     |                     | 5            | 58                | 23          | A | 3 | 2                | 2                       | 4 | 3 | 4                | 1                         | 3 | 25 | 4                | 2                | 3 | 3 | 3 | 3                | 3                  | 3                     | 4                    | 4                | 3              | 4                 | 4                    | 3                      | 4                 | 3 | 4 | 3 |   |   |   |   |
|               | 3   | X   |     |                     | 9            | 58                | 27          | A | 3 | 3                | 3                       | 3 | 3 | 4                | 4                         | 0 | 17 | 4                | 4                | 4 | 4 | 4 | 4                | 4                  | 4                     | 4                    | 3                | 3              | 3                 | 3                    | 4                      | 3                 | 4 | 3 | 4 | 3 |   |   |   |
|               | 4   | X   | X   |                     | 9            | 58                | 23          | A | 3 | 3                | 3                       | 2 | 4 | 4                | 3                         | 2 | 22 | 3                | 3                | 3 | 3 | 3 | 3                | 3                  | 3                     | 4                    | 3                | 4              | 4                 | 4                    | 4                      | 4                 | 4 | 4 | 4 | 4 | 4 |   |   |
|               | 5   | X   | X   |                     | 15           | 66                | 28          | D | 3 | 3                | 2                       | 1 | 4 | 4                | 4                         | 4 | 17 | 3                | 4                | 4 | 4 | 4 | 4                | 4                  | 4                     | 4                    | 4                | 3              | 4                 | 4                    | 4                      | 4                 | 4 | 4 | 4 | 4 | 4 |   |   |
|               | 6   | X   | X   | X                   | 15           | 63                | 27          | D | 3 | 3                | 3                       | 3 | 3 | 4                | 2                         | 3 | 23 | 3                | 3                | 2 | 3 | 3 | 3                | 3                  | 3                     | 4                    | 3                | 3              | 3                 | 3                    | 3                      | 3                 | 4 | 3 | 4 | 3 | 3 |   |   |
| Wave 1        | 7   |     | X   |                     | 8            | 50                | 19          | A | 1 | 0                | 3                       | 0 | 3 | 4                | 4                         | 1 | 25 | 3                | 4                | 3 | 3 | 3 | 3                | 3                  | 3                     | 3                    | 2                | 4              | 3                 | 3                    | 3                      | 3                 | 4 | 3 | 4 | 3 | 4 | 3 |   |
|               | 8   | X   | X   |                     | 8            | 50                | 21          | A | 2 | 2                | 0                       | 2 | 2 | 2                | 2                         | 2 | 27 | 3                | 3                | 3 | 3 | 3 | 3                | 3                  | 3                     | 3                    | 3                | 3              | 3                 | 3                    | 3                      | 3                 | 3 | 3 | 3 | 3 | 3 | 3 |   |
|               | 9   | X   |     |                     | 8            | 31                | 9           | A | 2 | 0                | 0                       | 2 | 3 | 3                | 1                         | 1 | 24 | 3                | 1                | 1 | 1 | 1 | 1                | 1                  | 1                     | 3                    | 3                | 0              | 1                 | 1                    | 1                      | 1                 | 1 | 1 | 1 | 1 | 1 | 1 | 1 |
|               | 10  | X   | X   |                     | 8            | 30                | 14          | A | 2 | 2                | 2                       | 1 | 2 | 3                | 2                         | 1 | 27 | 2                | 1                | 1 | 1 | 1 | 1                | 1                  | 1                     | 2                    | 1                | 2              | 1                 | 1                    | 1                      | 1                 | 1 | 1 | 1 | 1 | 1 | 1 | 1 |
|               | 11  | X   |     |                     | 8            | 27                | 11          | A | 1 | 1                | 1                       | 1 | 1 | 2                | 1                         | 2 | 23 | 1                | 2                | 1 | 1 | 1 | 1                | 1                  | 1                     | 3                    | 1                | 2              | 1                 | 1                    | 1                      | 1                 | 1 | 1 | 1 | 1 | 1 | 1 | 1 |
|               | 12  | X   |     |                     | 9            | 10                | 4           | D | 1 | 0                | 0                       | 0 | 0 | 2                | 2                         | 1 | 26 | 1                | 0                | 0 | 0 | 0 | 0                | 0                  | 0                     | 1                    | 0                | 1              | 0                 | 0                    | 0                      | 0                 | 0 | 0 | 0 | 0 | 0 | 0 | 0 |
| Wave 2        | 13  | X   | X   |                     | 15           | 53                | 20          | D | 3 | 1                | 2                       | 1 | 2 | 4                | 3                         | 3 | 16 | 2                | 3                | 2 | 2 | 2 | 2                | 2                  | 3                     | 4                    | 3                | 2              | 2                 | 2                    | 2                      | 2                 | 2 | 2 | 2 | 2 | 2 |   |   |
|               | 14  | X   | X   |                     | 15           | 42                | 12          | D | 2 | 1                | 1                       | 1 | 3 | 4                | 0                         | 1 | 24 | 2                | 3                | 2 | 2 | 2 | 2                | 2                  | 3                     | 1                    | 4                | 3              | 3                 | 3                    | 3                      | 3                 | 3 | 3 | 3 | 3 | 3 | 3 |   |
|               | 15  | X   | X   |                     | 15           | 33                | 14          | D | 2 | 1                | 1                       | 2 | 3 | 3                | 2                         | 0 | 25 | 2                | 2                | 2 | 2 | 2 | 2                | 2                  | 3                     | 0                    | 3                | 0              | 0                 | 0                    | 0                      | 0                 | 0 | 0 | 0 | 0 | 0 | 0 | 0 |
|               | 16  | X   |     |                     | 15           | 27                | 8           | D | 1 | 2                | 1                       | 1 | 4 | 4                | 0                         | 0 | 26 | 1                | 1                | 1 | 1 | 1 | 1                | 1                  | 1                     | 1                    | 1                | 4              | 4                 | 4                    | 4                      | 4                 | 4 | 4 | 4 | 4 | 4 | 4 | 4 |
|               | 17  | X   | X   |                     | 15           | 26                | 9           | D | 1 | 0                | 0                       | 0 | 1 | 3                | 2                         | 1 | 28 | 1                | 2                | 1 | 2 | 2 | 2                | 2                  | 1                     | 0                    | 3                | 2              | 2                 | 2                    | 2                      | 2                 | 2 | 2 | 2 | 2 | 2 | 2 | 2 |
|               | 18  | X   |     |                     | 15           | 25                | 11          | D | 2 | 1                | 1                       | 1 | 3 | 3                | 1                         | 1 | 23 | 0                | 1                | 1 | 1 | 1 | 1                | 1                  | 1                     | 0                    | 0                | 1              | 1                 | 1                    | 1                      | 1                 | 1 | 1 | 1 | 1 | 1 | 1 | 1 |
|               | 19  | X   | X   |                     | 15           | 25                | 7           | D | 0 | 2                | 1                       | 0 | 2 | 3                | 0                         | 0 | 27 | 1                | 1                | 0 | 2 | 2 | 2                | 2                  | 3                     | 0                    | 2                | 0              | 0                 | 0                    | 0                      | 0                 | 0 | 0 | 0 | 0 | 0 | 0 | 0 |
|               | 20  | X   | X   |                     | 15           | 22                | 8           | D | 0 | 1                | 1                       | 0 | 1 | 3                | 2                         | 2 | 27 | 1                | 1                | 0 | 0 | 0 | 0                | 0                  | 3                     | 0                    | 1                | 0              | 0                 | 0                    | 0                      | 0                 | 0 | 0 | 0 | 0 | 0 | 0 | 0 |
|               | 21  | X   |     |                     | 15           | 6                 | 0           | D | 0 | 0                | 0                       | 0 | 1 | 2                | 0                         | 0 | 29 | 0                | 1                | 0 | 0 | 0 | 0                | 0                  | 1                     | 0                    | 0                | 0              | 0                 | 0                    | 0                      | 0                 | 0 | 0 | 0 | 0 | 0 | 0 | 0 |
|               | 22  | X   |     |                     | 16           | 15                | 7           | D | 1 | 1                | 1                       | 0 | 0 | 1                | 1                         | 1 | 25 | 1                | 1                | 0 | 1 | 1 | 1                | 1                  | 1                     | 1                    | 1                | 1              | 0                 | 0                    | 0                      | 0                 | 0 | 0 | 0 | 0 | 0 | 0 | 0 |
| Wave 3        | 23  | X   |     |                     | 22           | 38                | 13          | D | 1 | 0                | 0                       | 0 | 4 | 4                | 2                         | 3 | 29 | 3                | 3                | 3 | 3 | 3 | 3                | 3                  | 1                     | 0                    | 1                | 1              | 1                 | 1                    | 1                      | 1                 | 1 | 1 | 1 | 1 | 1 |   |   |
|               | 24  | X   | X   | X                   | 22           | 28                | 15          | D | 2 | 2                | 1                       | 2 | 1 | 3                | 2                         | 1 | 28 | 2                | 2                | 1 | 3 | 3 | 3                | 1                  | 1                     | 0                    | 2                | 2              | 2                 | 2                    | 2                      | 2                 | 2 | 2 | 2 | 2 | 2 | 2 |   |
|               | 25  | X   |     |                     | 22           | 12                | 6           | D | 1 | 1                | 1                       | 0 | 1 | 2                | 1                         | 0 | 25 | 1                | 1                | 0 | 1 | 1 | 1                | 0                  | 0                     | 0                    | 0                | 0              | 0                 | 0                    | 0                      | 0                 | 0 | 0 | 0 | 0 | 0 | 0 | 0 |
| 4-week Screen | 26  | X   | X   |                     | 29           | 51                | 21          | A | 2 | 1                | 2                       | 2 | 2 | 4                | 3                         | 3 | 19 | 3                | 3                | 2 | 2 | 2 | 2                | 4                  | 3                     | 4                    | 1                | 1              | 1                 | 1                    | 1                      | 1                 | 1 | 1 | 1 | 1 | 1 | 1 |   |
|               | 27  | X   | X   |                     | 29           | 42                | 17          | A | 0 | 2                | 2                       | 2 | 4 | 4                | 3                         | 0 | 27 | 4                | 4                | 2 | 3 | 3 | 3                | 3                  | 0                     | 3                    | 3                | 3              | 3                 | 3                    | 3                      | 3                 | 3 | 3 | 3 | 3 | 3 | 3 |   |
|               | 28  | X   |     |                     | 35           | 13                | 6           | A | 0 | 0                | 1                       | 0 | 1 | 2                | 1                         | 0 | 24 | 3                | 1                | 3 | 1 | 1 | 1                | 0                  | 2                     | 0                    | 0                | 0              | 0                 | 0                    | 0                      | 0                 | 0 | 0 | 0 | 0 | 0 | 0 | 0 |
|               | 29  | X   | X   | X                   | 36           | 27                | 13          | A | 2 | 1                | 1                       | 2 | 2 | 0                | 1                         | 2 | 24 | 2                | 2                | 1 | 1 | 1 | 1                | 2                  | 0                     | 1                    | 1                | 1              | 1                 | 1                    | 1                      | 1                 | 1 | 1 | 1 | 1 | 1 | 1 | 1 |
|               | 30  | X   |     |                     | 36           | 5                 | 2           | / | 1 | 0                | 0                       | 0 | 1 | 2                | 0                         | 0 | 0  | /                | 0                | 0 | 0 | 0 | 0                | 0                  | 0                     | 0                    | 0                | 0              | 0                 | 0                    | 0                      | 0                 | 0 | 0 | 0 | 0 | 0 | 0 |   |
|               | 31  | X   |     |                     | 37           | 28                | 13          | A | 2 | 1                | 2                       | 1 | 1 | 3                | 1                         | 2 | 26 | 2                | 2                | 2 | 2 | 2 | 2                | 3                  | 1                     | 1                    | 2                | 2              | 2                 | 2                    | 2                      | 2                 | 2 | 2 | 2 | 2 | 2 | 2 |   |
|               | 32  | X   | X   |                     | 37           | 29                | 9           | A | 2 | 1                | 0                       | 0 | 2 | 1                | 2                         | 1 | 23 | 3                | 3                | 1 | 2 | 2 | 2                | 3                  | 2                     | 2                    | 2                | 2              | 2                 | 2                    | 2                      | 2                 | 2 | 2 | 2 | 2 | 2 | 2 |   |
|               | 33  | X   |     |                     | 37           | 13                | 6           | A | 1 | 0                | 1                       | 0 | 1 | 3                | 0                         | 1 | 29 | 1                | 2                | 1 | 2 | 2 | 2                | 0                  | 0                     | 1                    | 0                | 0              | 0                 | 0                    | 0                      | 0                 | 0 | 0 | 0 | 0 | 0 | 0 |   |
|               | 34  | X   | X   |                     | 40           | 5                 | 4           | A | 1 | 0                | 0                       | 1 | 1 | 1                | 0                         | 1 | 0  | /                | 0                | 0 | 0 | 0 | 0                | 0                  | 0                     | 0                    | 0                | 0              | 0                 | 0                    | 0                      | 0                 | 0 | 0 | 0 | 0 | 0 | 0 | 0 |
|               | 35  | X   |     |                     | 82           | 49                | 18          | A | 2 | 2                | 3                       | 3 | 4 | 4                | 3                         | 2 | 13 | 2                | 3                | 2 | 2 | 2 | 2                | 4                  | 3                     | 3                    | 3                | 3              | 3                 | 3                    | 3                      | 3                 | 3 | 3 | 3 | 3 | 3 | 3 |   |

Vestibular OM HA / Migraine Cognitive Mood/Anxiety Sleep
